# Supplementary material for: Solvent and ligand effects on selective mono- and dilithiation of 1-(chlorophenyl)pyrroles and 1-(methoxyphenyl)pyrroles †
Source: Royal Society of Chemistry journal article supplement (doi:10.1039/b100008j), 2001-01-01
Supplement: b100008j.doc [file b100008j.doc]

# Supplementary Data

Solvent and Ligand Effects on Selective Mono- and Dilithiation of
1-(Chlorophenyl)pyrroles and 1-(Methoxyphenyl)pyrroles

Katalin Fogassy1, Krisztina Kovács1, György M. Keserű2, László Tőke1 and
Ferenc Faigl1*

1Department of Organic Chemical Technology, Budapest University of Technology and Economics, H-1521 Budapest, Hungary

# 2Department of Chemical Informatical Technology, Budapest University of Technology and Economics, H-1521 Budapest, Hungary

# In this text numbering of the compounds, Schemes, Tables and literature references follow the numbering of the original article. All additional data are numbered continously.

# Molecular modelling

In order to help rationalization of the observed reactivities and selectivities, quantumchemical calculations were carried out. Conformational analysis of **4—6, 9—11, 18—20** was performed at AM1 semiempirical level17 using the SPARTAN 3.1 program package.18 The electrostatically fitted atomic charges were calculated by the Mertz-Kollman scheme as implemented in SPARTAN.

Due to the few rotational degree of freedom their conformational space was explored by the straightforward grid search technique utilising the torsional increment of 10 for the systematic rotation of the C(2)-C(1)-N-C() torsion between 0 and 360. Electrostatically fitted (ESP) atomic charges were calculated on structures corresponding the global minima. In the present studies the charges on carbon atoms were only considered (Table S1) because these data are more sensitive to the structural and electronic changes than that of the hydrogen atoms.19 For comparison, the charge distribution of the mother compound 1-phenylpyrrole (**31**, Sheme 6) is also presented in Table S1. We characterized the most stable conformers of **4—6, 9—11, 18—20** with their formation heats and the torsion angles of the benzene and the pyrrole rings, too. The C()-C()-C(’) triangle was used for definiton of the plane of the pyrrole while benzene moiety was considered as a planar ring. The torsion angles are about 27° in the cases of the *meta* (**9**, **10**, **11**) and *para* (**18**, 1**9**, **20**) isomers but its increase to 52° when the substituent situated in *ortho* position to the pyrrole ring. In the most stable conformers, the charge distribution on the pyrrole ring does not depend on the quality of the benzene substituent having in *meta* or *para* positions but the *ortho* substituents modify it. The calculations have demonstrated the different activating abilities of the halogen substituents and the methoxy group, too. In ground state, the charge distribution values on the substituent adjacent carbon atoms are quite small positive numbers in the halogenated series but those are much bigger negative values in the methoxy series. If the transition state of the molecules would be similar to the ground state during the metalation reaction, the halogen adjacent positions would be the most favored places for hydrogen metal exchange and C() position would be the second choise. The reaction in the OMe adjacent position could only be expected if a strong co-ordinative interaction between the directing group and the positive center of the lithiating agent could prevaile. Of course, the dinamic effects can not be interpreted using these calculations.

In order to compare the stabilities of the lithiated products, formation heats of the possible monolithiated and dilithiated 1-(chlorophenyl)pyrroles were also calculated using SPARTAN 3.1 program package18 (Scheme S1). On the basis of these data the *ortho* lithiated compounds **32**, **35** and **39** seemed to be the most stable, *i.e.* lithiation in the chlorine adjacent position might be thermodinamically favoured. The difference between the formation heats of **35** and **36** is negligible, parallel formation of the acid derivatives (**12** and **13**) of these compounds does not contradict the calculations. The formation heats of the  lithiated species (**33**, **37** and **41**) are significantly higher which is again in accordance with the experimental observation. The dilithiated compounds (**34**, **38** and **42**) have the highest formation heats. These compounds may form and exist in mixed aggregates in which second order interactions (*e.g.* donor acceptor interaction) can stabilize the dilithiated species.

# Preparation of 1-(halogenophenyl)pyrroles

Compounds **4-12** are known from the literature. These materials were prepared from the corresponding substituted aniline and *cis,trans*-2,5-dimethoxytetrahydrofuran in glacial acetic acid according to Gross’ general procedure.16

**1-(2-Bromophenyl)pyrrole** (**4**). Yield 80%, bp 97-98 °C/1.2 mmHg (lit.,7 110 oC/1.5 mmHg);H(CDCl3) 6.34 (2H, t, *J* 2.2, +’-H), 6.88 (2H, t, *J* 2.2, +’-H)*,* 7.14-7.41 (3H, m, 4+5+6-H), 7.69 (1H, dd, *J* 7.9, 1.3, 3-H).

**1-(3-Bromophenyl)pyrrole** (**9**). Yield 66%, mp 59-61 °C (form hexane-ethyl acetate) (lit.,20 63-64 oC from ethanol); H(CDCl3) 6.35 (2H, t, *J* 2.2, +’-H), 7.06 (2H, t, *J* 2.2, +’-H), 7.31 (1H, t, *J* 7.4, 5-H), 7.33 (1H, dt, *J* 7.4, 1.9, 6-H), 7.37 (1H, dt, *J* 7.4, 1.9, 4-H), 7.56 (1H, t, *J* 1.9, 2-H).

**1-(4-Bromophenyl)pyrrole** (**18**). Yield 81%, mp 90-91 °C (from hexane-ethylacetate) (lit.,21 91-92 oC); H(CDCl3) 6.35 (2H, t, *J* 2.2, +’-H), 7.04 (2H, t, *J* 2.2, +’-H), 7.26 (2H, d, *J* 8.7, 2+6-H), 7.53 (2H, d, *J* 8.7, 3+5-H).

**1-(2-Chlorophenyl)pyrrole** (**5**). Yield 77%, bp 86-87 °C/0.3 mmHg (lit.,20 143-145 oC/32 mmHg); H (CDCl3) 6.34 (2H, t, *J* 2.2, +’-H), 6.89 (2H, t, *J* 2.2, +’-H), 7.23 (3H, m, 4+5+6-H), 7.45-7.60 (1H, m, 3-H).

**1-(3-Chlorophenyl)pyrrole** (**10**). Yield 58% mp 51-52 °C (from ethanol) (lit.,22 51 oC), bp 108-109 °C/0.5 mmHg;H(CDCl3)6.34 (2H, t, *J* 2.1, +’-H), 7.04 (2H, t, *J* 2.1, +’-H), 7.18 (1H, dt, *J* 8.0, 2.0, 6-H), 7.24 (1H, dt, *J* 8.0, 2.0, 4-H), 7.31 (1H, t, *J* 8.0, 5-H), 7.37 (1H, t, *J* 2.0, 2-H),.

**1-(4-Chlorophenyl)pyrrole** (**19**). Yield 87%,mp 87-88 °C (from hexane-ethylacetate) (lit.,20 88-89 oC); H(CDCl3) 6.35 (2H, t, *J* 2.3, +’-H), 7.04 (2H, t, *J* 2.3, +’-H), 7.21-7.52 (4H, m, 2+3+5+6-H).

**1-(2-Methoxyphenyl)pyrrole** (**6**). Yield 62%, bp 88-94 C/0.5 mmHg (lit.,8 88-94 oC/0.5 mmHg); H(CDCl3) 3.81 (3H, s, OMe), 6.30 (2H, t like m, *J* 4.0, +’-H), 6.91-7.08 (4H, m, 3+5++’-H), 7.11-7.32 (2H, m, 4+6-H).

**1-(3-Methoxyphenyl)pyrrole** (**11**). Yield 62%, bp 98-100 C/0.4 mmHg (lit.,8 98-100 oC/0.4 mmHg); H(CDCl3) 3.84 (3H, s, OMe), 6.36 (2H, t, *J* 2.3, +’-H), 6.80 (1H, ddd, *J* 8.1, 2.1, 1.0, 4-H), 6.93 (1H, t, *J* 2.1, 2-H), 6.99 (1H, ddd, *J* 8.1, 2.1 1.0, 6-H), 7.10 (2H, t, *J* 2.3, +’-H), 7.33 (1H, t, *J* 8.1, 5-H).

**1-(4-Methoxyphenyl)pyrrole** (**20**). Yield 65%, mp 111-113 C (from methanol) (lit.,8 111-113 oC); H(CDCl3) 3.82 (3H, s, OMe), 6.33 (2H, t, *J* 2.4, +’-H), 6.94 (2H, ddd, *J* 9.0, 3.2, 2.5, 3+5-H), 7.00 (2H, t, *J* 2.4, +’-H), 7.31 (2H, ddd, *J* 9.0, 3.2, 2.5, 2+6-H).

## The known products of consecutive metalation, carboxylation sequences

**1-(4-Carboxyphenyl)pyrrole** (**22**). Mp 265-270 °C (from hexane) (lit.,23 265-270 oC); H(DMSO-d6) 6.30 (2H, t, *J* 2.1, +’-H), 7.49 (2H, t, *J* 2.1, +’-H), 7.71 (2H, d, *J* 8.7, 2+6-H), 7.98 (2H, d, *J* 8.7, 3+5-H).

**1-(4-Bromo-2-carboxyphenyl)pyrrole** (**23**). Mp 111-112 oC (from hexane) (lit.,24 112 oC); H(CDCl3) 6.37 (2H, t, J 2.2, +’-H), 7.14 (2H, t, J 2.2, +’-H), 7.54 (1H, d, J 8.6, 6-H), 7.69 (1H, dd, J 8.6, 2.7, 5-H), 8.30 (1H, d, J 2.7, 3-H).

**1-(2-Carboxy-3-chlorophenyl)pyrrole** (**12**). Mp 123-125 °C (from dichloromethane-hexane) (lit.,25 125 oC); H(CDCl3) 6.25 (2H, t, *J* 2.3, +’-H), 6.89 (2H, t, *J* 2.3, +’-H), 7.21-7.35 (3H, m, 4+5+6-H).

**1-(3-Carboxy-4-chlorophenyl)pyrrole** (**24**).26Mp 149-151 °C (from hexane); H(CDCl3) 6.39 (2H, t, *J* 2.4, +’-H), 7.10 (2H, t, *J* 2.4, +’-H), 7.49 (1H, dd, *J* 8.5, 2.2, 6-H), 7.55 (1H, d, *J* 8.5, 5-H), 8.05 (1H, d, *J*  2.2, 2-H).

**1-(2-Carboxy-4-chlorophenyl)pyrrole** (**25**).Mp 145-147°C (from ethanol) (lit.,25 145 oC); H(CDCl3) 6.35 (2H, t, *J*  2.2, +’-H), 6.83 (2H, t, *J* 2.2, +’-H), 7.34 (1H, d, *J* 8.6, 6-H), 7.58 (1H, dd, *J* 8.6, 2.5, 5-H), 7.90 (1H, d, *J* 2.5, 3-H).

**1-(2-Carboxy-3-methoxyphenyl)pyrrole** (**14**). Mp 117-119 C (from hexane) (lit.,8 117-119 oC); H(CDCl3) 3.88 (3H, s, OMe), 6.29 (2H, t, *J* 2.0, +’-H), 6.86-6.91 (3H, m, 6++’-H), 6.93 (1H, dd, *J* 7.8, 1.0, 4-H), 7.38 (1H, t, *J* 7.8, 5-H).

**1-(3-Methoxy-[2-2H]phenyl)pyrrole**. Oil, H(CDCl3) 3.84 (3H, s, OMe), 6.36 (2H, t, *J* 2.3, +’-H), 6.80 (1H, dd, *J* 8.1, 2.2, 4-H), 6.99 (1H, dd, *J* 8.1, 2.2, 6-H), 7.10 (2H, t, *J* 2.3, +’-H), 7.33 (1H, t, *J* 8.1, 5-H).

**1-(3-Carboxy-4-methoxyphenyl)pyrrole** (**27**). Mp 146-148 C (from hexane) (lit.,8 146-148 oC); H(CDCl3) 4.09 (3H, s, OMe), 6.31 (2H, t, *J* 2.2, +’-H), 7.03 (2H, t, *J* 2.2, +’-H), 7.09 (1H, d, *J* 9.1, 5-H), 7.52 (1H, dd, *J* 9.1, 2.9, 6-H), 8.15 (1H, d, *J* 2.9, 2-H).

**1-(4-Methoxy-[3-2H]phenyl)pyrrole**. White solid, mp 110-112 oC (from THF); H(CDCl3) 3.82 (3H, s, OMe), 6.33 (2H, t, *J* 2.4, +’-H), 6.94 (2H, d, *J* 9.0, 5-H), 7.00 (2H, t, *J* 2.4, +’-H), 7.28-7.35 (2H, m, 2+6-H).

**1-(3-Methoxyphenyl)pyrrole-2-carboxylic acid** (**16**). Mp 137-138 C (from hexane) (lit.,8 137-138 oC); H(CDCl3) 3.81 (3H, s, OMe), 6.27 (1H, dd, *J* 3.9, 2.7, ’-H), 6.83 (1H, t, *J* 2.1, 2-H), 6.86-6.95 (2H, m, 4+6-H), 6.96 (1H, t like m, *J* 2.2, ’-), 7.18 (1H, dd, *J* 3.9, 1.8, -H), 7.28 (1H, t, *J* 8.0, 5-H).

**1-(4-Methoxyphenyl)pyrrole-2-carboxylic acid** (**28**) mp 150-152 C (from hexane) (lit.,8 150-152 oC); H(CDCl3) 3.81 (3H, s, OMe), 6.23 (1H, dd, *J* 3.2, 2.3, ’-H), 6.90 (2H, d, *J* 9.0, 3+5-H), 6.91 (1H, dd, *J* 3.2, 1.9, -H), 7.12 (1H, dd, *J* 2.3, 1.9, ’-H), 7.20 (2H, d, *J* 9.0, 2+6-H).

**8-Chloro-4H,6H-pyrrolo-1,2-a4,1benzoxazepine**2(**30**) oil, H (CDCl3) 4.42 (2H, s, CH2), 4.49 (2H, s, CH2), 6.29-6.37 (2H, m, (’+’-H), 7.03 (1H, t, *J* 2.2, -H), 7.35 (1H, d, *J* 8.1, 6-H), 7.42 (1H, br. s, 3-H), 7.44 (1H, dd, *J* 8.1, 2.3, 5-H).

### References to the Supplementary Material

2. S. Massa, F. Corelli, G. C. Pantaleoni and G. Palumbo, *Farmaco Ed. Sci*., 1983, **38**, 893.

7. G. W. H. Cheeseman and S. G. Greenberg, *J. Organomet. Chem*., 1979, **166**, 139.

8. F. Faigl, K. Fogassy, A. Thurner and L. Tőke, *Tetrahedron*, 1997, **53**, 4883.

1. H. Gross, *Chem.Ber.*, 1962, **95**, 2270.
2. M. J. S. Dewar, E. G. Zoebisch, E. F. Healy and J. J. P. Stewart, *J. Am. Chem. Soc.* 1985, **107**, 3902.
3. SPARTAN 3.1; Wavefunction, Inc. 18401 Von Karman Ave., Ste. 370 Irvine, CA 92612 U.S.A.
4. G. Makara, Gy. M. Keserű and A. Kovács, *J. Chem. Soc., Perkin Trans. 2.,* 1994, **107**, 591.
5. J. P. Wibaut and J. Dhont, *Recl. Trav. Chim.,* 1943, **62,** 272.
6. R. A. Jones, *Aust. J. Chem.,* 1966, **19**, 289.
7. H. El Khadem, L. A. Kemler and Z. M. El Shafei, *Heterocycl. Chem.,* 1972,**9**, 1413.
8. South-African Patent No. 67 06.465 (C.A. **70** P96611n (1969)); C. Hansch, S. D. Rockwell, P. Y. C. Jow, A. Leo and E. E. Steller: *J. Med. Chem.,* 1977, **20**, 304
9. L. Bouyazza, J. C. Lancelot, S. Rault and M. Robba, *J. Heterocycl. Chem*., 1991, **28**, 77.
10. H. Sugihara, N. Matsumoto, Y. Hamura, Y. Kawamatsu, *Arzneim.Forsch*., 1974, **24**, 1560.
11. South-African Patent No. 72 01.129 (C.A. **81** P63478e (1974)).

Table S1. Charge distribution of the carbon atoms, formation heats and
 torsion angles of the model compounds

| Charge distribution values |  |  | | | Model compounds | | |  | | |
| --- | --- | --- | --- | --- | --- | --- | --- | --- | --- | --- |
| **31** | **4** | **9** | **18** | **5** | **10** | **19** | **6** | **11** | **20** |
| C() | -0.13 | -0.08 | -0.13 | -0.13 | -0.10 | -0.14 | -0.14 | -0.12 | -0.14 | -0.14 |
| C(') | -0.13 | -0.12 | -0.13 | -0.13 | -0.12 | -0.13 | -0.12 | -0.15 | -0.13 | -0.16 |
| C() | -0.18 | -0.21 | -0.18 | -0.18 | -0.19 | -0.16 | -0.17 | -0.19 | -0.18 | -0.19 |
| C(') | -0.18 | -0.15 | -0.17 | -0.18 | -0.17 | -0.18 | -0.19 | -0.19 | -0.18 | -0.18 |
| C(2) | -0.15 | -0.27a | 0.06 | -0.23 | -0.20a | -0.04 | -0.20 | 0.27a | -0.29 | -0.09 |
| C(3) | -0.07 | 0.09 | -0.20a | 0.10 | 0.02 | -0.10a | 0.04 | -0.18 | 0.37 a | -0.21 |
| C(4) | -0.13 | -0.18 | 0.05 | -0.22a | -0.14 | -0.03 | -0.15a | -0.10 | -0.28 | 0.33 a |
| C(5) | -0.06 | -0.01 | -0.15 | 0.11 | -0.05 | -0.10 | 0.04 | -0.14 | 0.01 | -0.24 |
| C(6) | -0.16 | -0.24 | -0.07 | -0.24 | -0.20 | -0.11 | -0.20 | -0.07 | -0.22 | -0.05 |
| Formation heat (kcal/mol) | 77.12 | 85.31 | 82.64 | 82.13 | 72.65 | 70.58 | 70.29 | 41.55 | 39.49 | 39.60 |
| Torsion angle of the two rings | 27° | 52° | 27° | 25° | 46° | 27° | 26° | 31° | 27° | 29° |

aThe carbon atom connected to the substituent Br, Cl or OMe, respectively.

|  |  |  |  |
| --- | --- | --- | --- |
| **31** | **32**  65.23 kcal/mol | **33**  79.34 kcal/mol | **34**  84.32 kcal/mol |
|  |  |  |  |
| **35**  61.50 kcal/mol | **36**  62.75 kcal/mol | **37**  75.80 kcal/mol | **38**  89.63 kcal/mol |
|  |  |  |  |
| **39**  62.49 kcal/mol | **40**  75.02 kcal/mol | **41**  75.68 kcal/mol | **42**  88.87 kcal/mol |

# Scheme S1.
